# Supplementary material for: Intermolecular interactions, regioselectivity, and biological activity of l-ascorbic acid, nicotinic acid and their cocrystal
Source: Royal Society of Chemistry journal article supplement (doi:10.1039/d4ce00770k), 2024-01-01
Supplement: d4ce00770k1.pdf [file d4ce00770k1.pdf]

## Supplementary information

### Intermolecular interactions, Regioselectivity, and Biological Activity of L-ascorbic Acid, Nicotinic Acid and their Cocrystal

Diana N. Evtushenko,<sup>a,e</sup> Alexander V. Fateev,<sup>a,d</sup> Mark A. Khaitnovsky,<sup>e</sup> Julia Polishchuk,<sup>a</sup> Oleg.V. Kokorev <sup>b</sup>, T.F. Nasibov <sup>b</sup>, A.V. Gorokhova <sup>b</sup>, U.A. Bariev <sup>b</sup>, K.V. Zaitsev <sup>c</sup>, Igor.A. Khlusov, <sup>b</sup> and Olga V. Vodyankina\*<sup>a</sup>..

- [a] Faculty of Chemistry  
Tomsk State University  
36, Lenin Ave., 634050 Tomsk, Russia  
e-mail: Olga Vodyankina vodyankina\_o@mail.ru
- [b] Laboratory of Cellular and Microfluidic Technologies  
Institution Siberian State Medical University (SibSMU)  
2, Moskovsky trakt 634050 Tomsk, Russia
- [c] Experimental Laboratory of Biomedival Technologies  
Tomsk Scientific Research Institute of Balneology and Physiotherapy, Branch of SibFNC of FMBA of Russia  
1, st. Luxemburg, 634009Tomsk, Russia
- [d] Faculty of Biology and Chemistry  
Tomsk State Pedagogical University  
60, st. Kievskaya, 634061 Tomsk, Russia
- [e] Synchrotron Radiation Facility - Siberian Circular Photon Source "SKIF"  
Boreskov Institute of Catalysis of Siberian Branch of the Russian Academy of Sciences (SRF "SKIF")  
2, Morskoy Ave., 630090 Novosibirsk, Russia

**Table S1** Preparation method and characteristics (DSC, powder X-ray diffraction and IR spectroscopy) of L-Asc · Nic co-crystal prepared by different methods

| L-Asc · Nic (RUWFAR (CSD 5.40)) <sup>16</sup>                                                                                                                                                                                                                                | L-Asc · Nic [This work]                                                                                 |
|------------------------------------------------------------------------------------------------------------------------------------------------------------------------------------------------------------------------------------------------------------------------------|---------------------------------------------------------------------------------------------------------|
| L-Ascorbic acid, 88.1 mg (0.500 mmol), and nicotinic acid, 61.6 mg (0.500 mmol), were dissolved in 6 mL of MeOH and heated until a clear solution was obtained. The solution was slowly evaporated at room temperature and colorless crystals were harvested after two days. | Samples of L-AscNic cocrystals were obtained according to the procedure described in Ref. <sup>16</sup> |

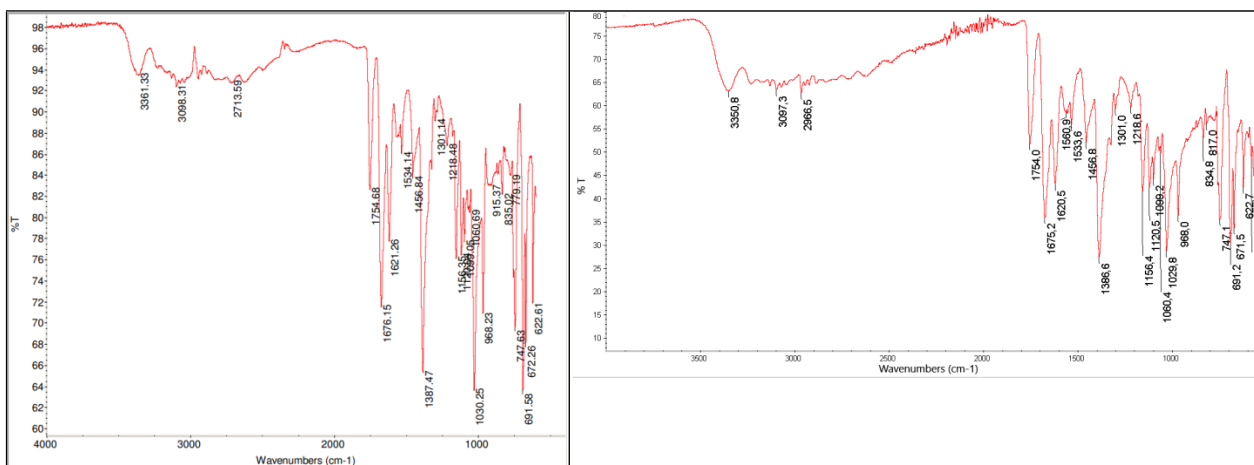

**IR\***

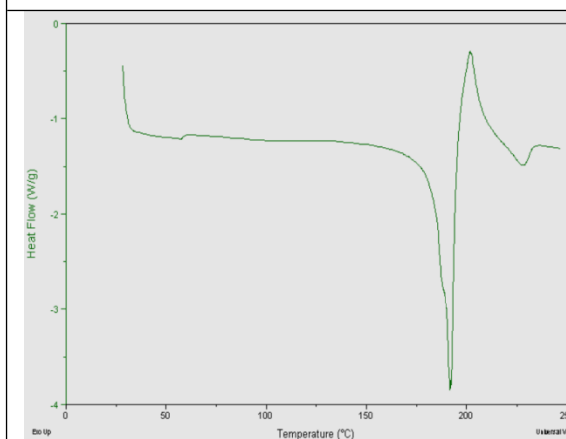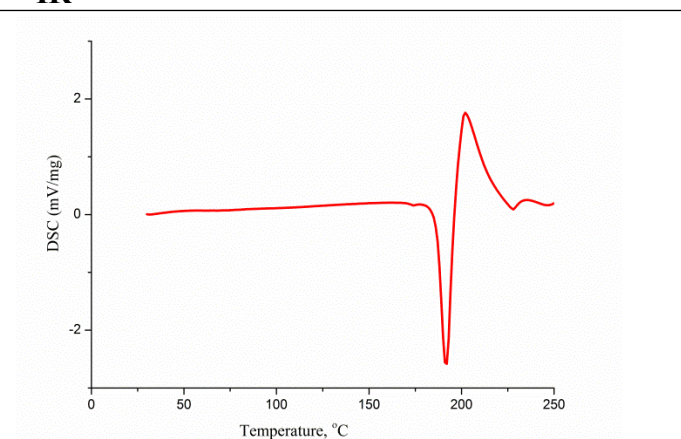

**DSC\*\***

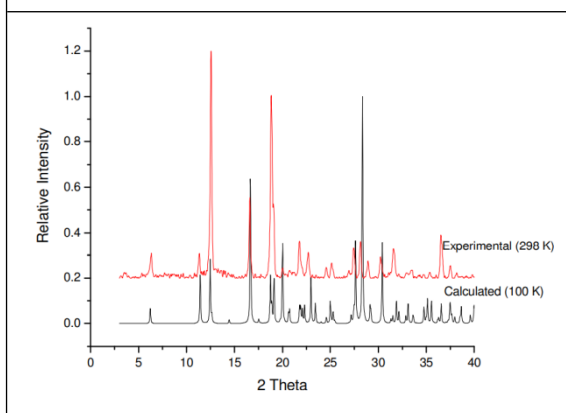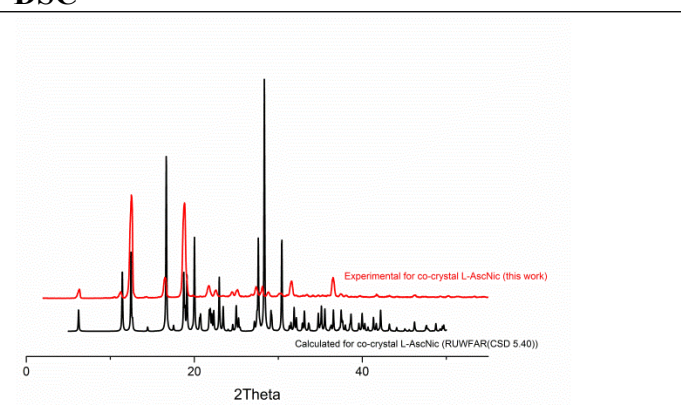

**PXRD\*\*\***

\*The FT-IR spectra of the powder samples were recorded on the Nicolet 6700 Fisher Thermo Scientific Instrument using the ATR FTIR in the range of 4000-400  $\text{cm}^{-1}$ .

\*\*The differential scanning calorimetry (DSC) measurements were performed to compare the thermal behaviour of co-crystals. We used the NETZSCH STA 449F1 STA449F1A-0237-M instrument in the temperature range of 30-600° C at a heating rate of 10 K/min in an argon atmosphere.

\*\*\*X-ray powder diffraction (XRPD) patterns were measured using the STOE-MP diffractometer with Cu anode ( $\text{K}\alpha_1$ ,  $\lambda = 1.5406 \text{ \AA}$ , bent Ge (111) monochromator) and the Dectris Mythen 1K detector; data collected in transmission mode with 0.015-degree steps, data collection time was 2 seconds per step.

**Table S2** Hydrogen-bond parameters of pristine L-Asc structure (COFKOA (CSD)),<sup>24</sup> Nic crystal structure (NICOAC02 (CSD)),<sup>25</sup> L-AscNic cocrystal structure (RUWFAR (CSD))<sup>14</sup>

| L-Asc crystal structure (COFKOA (CSD))[24] |                                              | Nic crystal structure (NICOAC02 (CSD))[25] |                                              | L-Asc-Nic cocrystal structure (RUWFAR (CSD))[14] |                                              |
|--------------------------------------------|----------------------------------------------|--------------------------------------------|----------------------------------------------|--------------------------------------------------|----------------------------------------------|
| hydrogen bond                              | D—H (Å)/H...A (Å)/<br>/D...A (Å)/D—H...A (°) | hydrogen bond                              | D—H (Å)/H...A (Å)/<br>/D...A (Å)/D—H...A (°) | hydrogen bond                                    | D—H (Å)/H...A (Å)/<br>/D...A (Å)/D—H...A (°) |
| O(4a) – H...O(2a)                          | 0.820/1.929/2.681/151.9                      | O(1) – H...N                               | 0.847/1.843/2.660/161.8                      | C(10) <sub>Nic</sub> – H...O(5) <sub>Asc</sub>   | 0.949/2.377/3.042/126.8                      |
| O(4b) – H...O(2b)                          | 0.820/1.908/2.667/153.3                      | C(2) – H...O(2)                            | 0.939/2.550/3.236/130.2                      | O(5) <sub>Asc</sub> – H...O(6) <sub>Asc</sub>    | 0.840/1.874/2.701/167.9                      |
| O(3a) – H...O(5a)                          | 0.820/1.832/2.648/172.7                      | C(4) – H...O(2)                            | 0.990/2.608/3.317/128.6                      | O(6) <sub>Asc</sub> – H...O(4) <sub>Asc</sub>    | 0.840/1.916/2.746/169.1                      |
| O(5b) – H...O(3b)                          | 0.820/2.010/2.798/142.4                      | C(6) – H...O(2)                            | 0.980/2.576/3.247/125.7                      | O(3) <sub>Asc</sub> – H...O(7) <sub>Nic</sub>    | 0.841/1.786/2.593/160.1                      |
| O(3b) – H...O(6a)                          | 0.819/1.812/2.609/163.8                      |                                            |                                              | O(4) <sub>Asc</sub> – H...O(8) <sub>Nic</sub>    | 0.840/1.705/2.479/152.2                      |
| O(6b) – H...O(3a)                          | 0.820/2.206/2.944/149.9                      |                                            |                                              | C(11) <sub>Nic</sub> – H...O(2) <sub>Asc</sub>   | 0.950/2.282/3.139/149.7                      |
| O(6a) – H...O(5b)                          | 0.819/1.978/2.782/166.8                      |                                            |                                              | N <sub>Nic</sub> – H...O(2) <sub>Asc</sub>       | 0.879/2.416/2.979/122.1                      |
| C(6b) – H...O(1a)                          | 0.969/2.684/3.466/138.0                      |                                            |                                              | N <sub>Nic</sub> – H...O(7) <sub>Nic</sub>       | 0.879/2.188/2.959/146.1                      |
| O(5a) – H...O(6b)                          | 0.819/1.921/2.714/162.5                      |                                            |                                              |                                                  |                                              |
| C(6a) – H...O(4b)                          | 0.969/2.601/3.513/156.7                      |                                            |                                              |                                                  |                                              |
| C(6a) – H...O(1b)                          | 0.970/2.605/3.327/131.4                      |                                            |                                              |                                                  |                                              |
| C(6b) – H...O(4a)                          | 0.970/2.515/3.393/150.4                      |                                            |                                              |                                                  |                                              |

**Table S3** Total effective charge of the L-ascorbic molecule in the structures of L-ascorbic acid (1) and its cocrystals (2–11)<sup>6</sup>

| Coformer                                                              | CSD refcode           | Total effective charge of L-ascorbic (e) |             |             | Reference                      |
|-----------------------------------------------------------------------|-----------------------|------------------------------------------|-------------|-------------|--------------------------------|
|                                                                       |                       | Mulliken                                 | Voronoi     | Hirshfeld   |                                |
| 5-(1,2-Dihydroxyethyl)-<br>3,4-dihydroxy-<br>furan-2(H)-one, <b>1</b> | COFKOA                | 0.00 –0.00                               | 0.02 –0.01  | 0.03 –0.03  | McMonagle & Probert (2019)     |
|                                                                       | COFKOA01              | 0.05 –0.05                               | 0.01 –0.01  | 0.03 –0.03  |                                |
|                                                                       | COFKOA02              | 0.04 –0.04                               | 0.01 –0.01  | 0.01 –0.01  |                                |
|                                                                       | LASCAC12              | 0.06 –0.06                               | 0.09 –0.09  | 0.12 –0.12  |                                |
|                                                                       | LASCAC14              | 0.01 –0.01                               | 0.06 –0.06  | 0.08 –0.08  |                                |
| 4-(Pyridin-4-yl)pyridinium, <b>2</b>                                  | LASCAC15              | 0.03 –0.03                               | 0.07 –0.07  | 0.11 –0.11  | Milanesio <i>et al.</i> (1997) |
|                                                                       | POHNUY                | –0.04                                    | 0.01        | 0.04        | Guzei (2009)                   |
| Nicotinamide, <b>3</b>                                                |                       | –0.04                                    | –0.03       | –0.03       | Fronczek (2016)                |
|                                                                       | OXOHEQ                | 0.02                                     | 0.09        | 0.13        |                                |
| Nicotinamide (three molecules in<br>the asymmetric unit)              |                       | –0.05                                    | 0.00        | –0.03       | Sylvester <i>et al.</i> (2019) |
|                                                                       | OXOHIU                | 0.01                                     | 0.04        | 0.01        |                                |
| Isonicotinamide, <b>4</b>                                             | OXOGUF                | 0                                        | –0.19       | 0           | Wang <i>et al.</i> (2016a)     |
| Bis(isonicotinamide)                                                  | OXOHAM <sup>d</sup>   | –0.02                                    | –0.08       | –0.11       |                                |
| 3-Bromopyridin-4(1H)-one, <b>5</b>                                    |                       | 0.15                                     | –0.26       | –0.03       | Wang <i>et al.</i> (2016b)     |
|                                                                       | ULUZUY <sup>c</sup>   | 0.03                                     | 0.09        | 0.14        |                                |
| Betaine, <b>6</b>                                                     | RUWFEV                | 0.67                                     | 0.03        | 0.04        | Kavuru <i>et al.</i> (2010)    |
| Nicotinic acid, <b>7</b>                                              | RUWFAR <sup>b</sup>   | –0.012                                   | –0.01       | –0.03       |                                |
| Sarcosine, <b>8</b>                                                   | RUWDUJ <sup>b</sup>   | 0.01                                     | 0.01        | 0.02        | Goher <i>et al.</i> (2003)     |
| Isoquinoline-1-carboxylic acid, <b>9</b>                              | ERAVAU                | –0.07                                    | –0.18       | –0.25       |                                |
| L-Serine, <b>10</b>                                                   | SERASC10 <sup>c</sup> | 0.01                                     | 0.08        | 0.17        | Sudhakar <i>et al.</i> (1980)  |
| Picolinic acid, <b>11</b>                                             | –                     | –0.04 –0.03                              | –0.17 –0.16 | –0.24 –0.24 | This work                      |

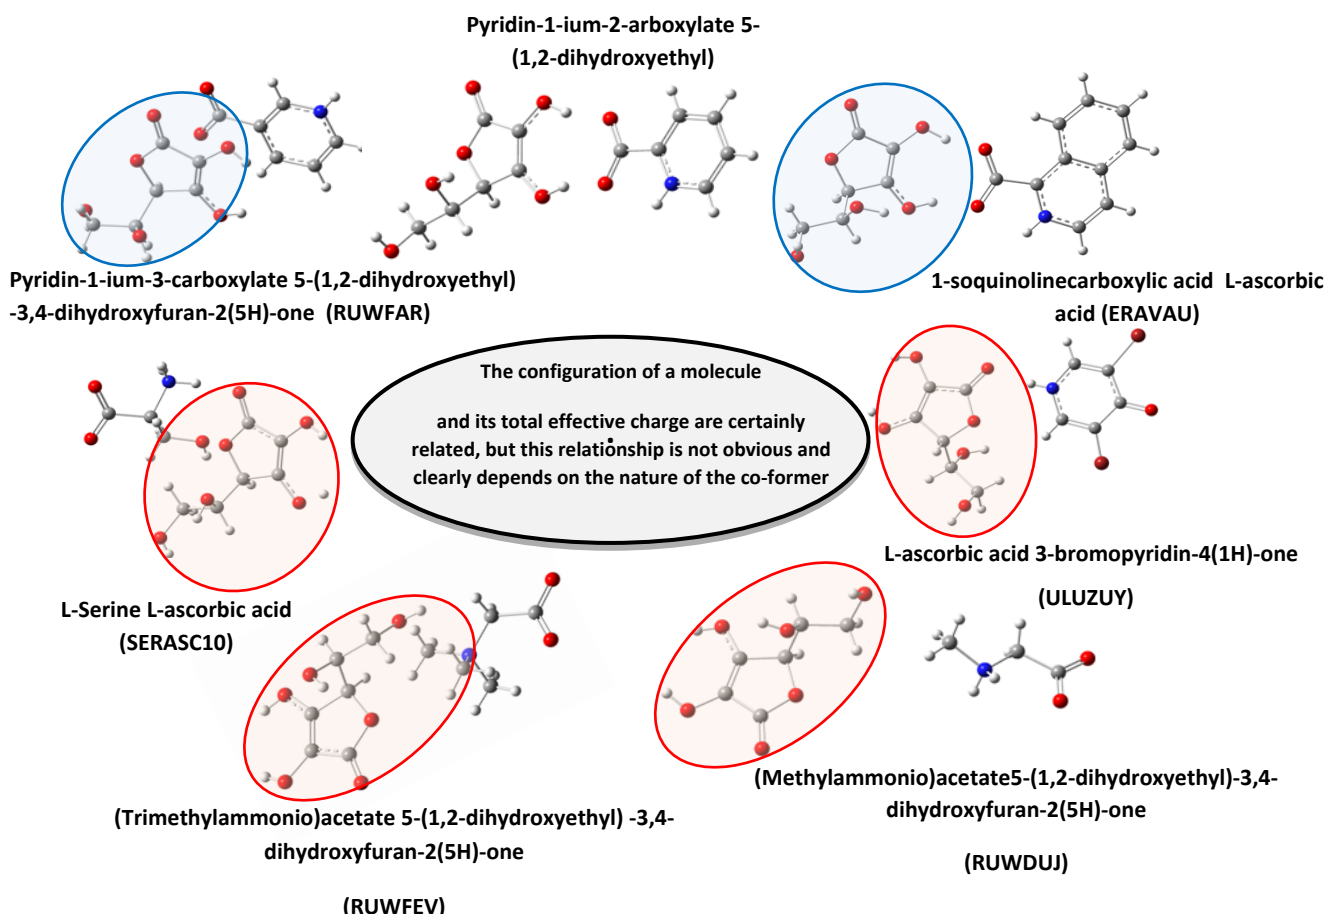

**Figure S1** Structures of binary co-crystals containing the L-Asc molecule in a chelating configuration indicating the sign of the total effective charge of the molecule (Table S3).

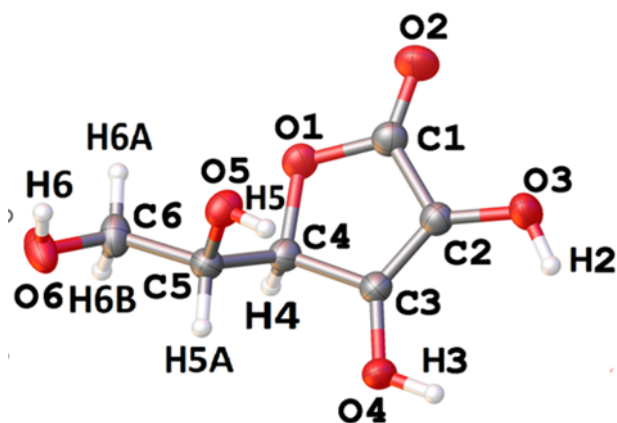

**Figure S2** Structure of the L-Asc molecule showing the atom-numbering schemes<sup>6</sup>

**Table S4** The calculated descriptor values (MultiWFN) for all atoms of the conformer molecule 'a' (COFKOA(CSD)), the atom-numbering scheme at Figure S2

| Atom index | $f^+$   | $f^-$   | $f^0$   | $f^2$    |
|------------|---------|---------|---------|----------|
| O1         | 0.02636 | 0.06853 | 0.04744 | -0.04217 |
| O2         | 0.06802 | 0.19974 | 0.13388 | -0.13173 |

|     |         |         |         |          |
|-----|---------|---------|---------|----------|
| O3  | 0.05570 | 0.06016 | 0.05793 | -0.00445 |
| O4  | 0.03634 | 0.08373 | 0.06003 | -0.04739 |
| O5  | 0.01695 | 0.08213 | 0.04954 | -0.06518 |
| O6  | 0.01944 | 0.09693 | 0.05818 | -0.07750 |
| C1  | 0.09221 | 0.04636 | 0.06929 | 0.04586  |
| C2  | 0.07344 | 0.11842 | 0.09593 | -0.04498 |
| C3  | 0.10561 | 0.09712 | 0.10137 | 0.00849  |
| C4  | 0.02504 | 0.03065 | 0.02785 | -0.00561 |
| C5  | 0.02035 | 0.02695 | 0.02365 | -0.00659 |
| C6  | 0.02360 | 0.02276 | 0.02318 | 0.00083  |
| H2  | 0.06306 | 0.00940 | 0.03623 | 0.05366  |
| H3  | 0.09759 | 0.00569 | 0.05164 | 0.09191  |
| H4  | 0.05343 | 0.00873 | 0.03108 | 0.04470  |
| H5  | 0.03271 | 0.00825 | 0.02048 | 0.02446  |
| H5A | 0.03729 | 0.00866 | 0.02298 | 0.02863  |
| H6  | 0.07405 | 0.00841 | 0.04123 | 0.06564  |
| H6A | 0.04247 | 0.00791 | 0.02519 | 0.03456  |
| H6B | 0.02730 | 0.00954 | 0.01842 | 0.01776  |

**Table S5** The calculated descriptor values (MultiWFN) for all atoms of the conformer molecule ‘b’ (COFKOA(CSD)), the atom-numbering scheme at Figure S2

| Atom index | f <sup>+</sup> | f <sup>-</sup> | f <sup>0</sup> | f <sup>2</sup> |
|------------|----------------|----------------|----------------|----------------|
| O1         | 0.02516        | 0.07035        | 0.04775        | -0.04519       |
| O2         | 0.06430        | 0.20437        | 0.13433        | -0.14008       |
| O3         | 0.03393        | 0.08514        | 0.05953        | -0.05121       |
| O4         | 0.05576        | 0.06010        | 0.05793        | -0.00434       |
| O5         | 0.01778        | 0.07308        | 0.04543        | -0.05530       |
| O6         | 0.01965        | 0.09139        | 0.05552        | -0.07174       |
| C1         | 0.08788        | 0.04831        | 0.06809        | 0.03957        |
| C2         | 0.06762        | 0.12651        | 0.09707        | -0.05890       |
| C3         | 0.10095        | 0.10034        | 0.10065        | 0.00061        |
| C4         | 0.02493        | 0.03192        | 0.02842        | -0.00699       |
| C5         | 0.02055        | 0.02700        | 0.02377        | -0.00645       |
| C6         | 0.02373        | 0.02287        | 0.02330        | 0.00086        |
| H2         | 0.06545        | 0.00962        | 0.03754        | 0.05584        |
| H3         | 0.09917        | 0.00570        | 0.05244        | 0.09347        |
| H4         | 0.04174        | 0.00953        | 0.02563        | 0.03222        |
| H5         | 0.06571        | 0.00688        | 0.03629        | 0.05883        |
| H5A        | 0.03851        | 0.00446        | 0.02149        | 0.03404        |
| H6         | 0.06814        | 0.00810        | 0.03812        | 0.06003        |
| H6A        | 0.04225        | 0.00967        | 0.02596        | 0.03258        |
| H6B        | 0.02728        | 0.00471        | 0.01599        | 0.02257        |

**Table S6** The calculated descriptor values (MultiWFN) for all atoms of the conformer molecule L-Asc<sub>L-AscNic</sub> (RUWFAR (CSD)), the atom-numbering scheme at Figure S2

| Atom index | f <sup>+</sup> | f <sup>-</sup> | f <sup>0</sup> | f <sup>2</sup> |
|------------|----------------|----------------|----------------|----------------|
| O1         | 0.01669        | 0.07558        | 0.04613        | -0.05889       |
| O2         | 0.04240        | 0.23208        | 0.13724        | -0.18968       |
| O3         | 0.03511        | 0.08108        | 0.05809        | -0.04598       |
| O4         | 0.05618        | 0.05856        | 0.05737        | -0.00238       |
| O5         | 0.01954        | 0.06093        | 0.04023        | -0.04139       |
| O6         | 0.01760        | 0.08487        | 0.05124        | -0.06727       |
| C1         | 0.05862        | 0.05042        | 0.05452        | 0.00820        |
| C2         | 0.05498        | 0.12044        | 0.08771        | -0.06546       |
| C3         | 0.07677        | 0.10239        | 0.08958        | -0.02562       |
| C4         | 0.02017        | 0.02852        | 0.02434        | -0.00836       |
| C5         | 0.02407        | 0.03105        | 0.02756        | -0.00697       |
| C6         | 0.02315        | 0.02441        | 0.02378        | -0.00126       |
| H2         | 0.10111        | 0.00740        | 0.05425        | 0.09371        |
| H3         | 0.12820        | 0.00544        | 0.06682        | 0.12276        |
| H4         | 0.03795        | 0.00919        | 0.02357        | 0.02876        |
| H5         | 0.08126        | 0.00555        | 0.04340        | 0.07572        |
| H5A        | 0.05530        | 0.00415        | 0.02973        | 0.05115        |
| H6         | 0.07198        | 0.00720        | 0.03959        | 0.06478        |
| H6A        | 0.01902        | 0.00404        | 0.01153        | 0.01498        |
| H6B        | 0.05128        | 0.00665        | 0.02897        | 0.04463        |
